# Supplementary material
Source: PubMed Central journal article supplement (PMC6724725)
Supplement: NIHMS1033214-supplement-Supporting_Materials.pdf [file NIHMS1033214-supplement-Supporting_Materials.pdf]

1 **Supplemental Materials, Methods and Results**

2 **Materials and Methods**

3 **Animals, bacterial strain and experimental infections**

4 C57BL/6 *gpt* delta mice were constructed as described previously (1). It has been  
5 documented that 129/SvEv *Rag2<sup>-/-</sup>Il10<sup>-/-</sup>* mice can be utilized to dissect the molecular mechanisms  
6 underlying bacteria-induced intestinal carcinogenesis, including the important role of Il-10 in  
7 inhibiting colon cancer of *H. hepaticus* infection (2). Thus 129/SvEv *Rag2<sup>-/-</sup>Il10<sup>-/-</sup> gpt* delta  
8 (*Rag2Il10gpt*) mice were generated by back-crossing C57BL/6 *gpt* delta mice on 129/SvEv *Rag2<sup>-/-</sup>*  
9 *Il10<sup>-/-</sup>* mice for 10 generations. This *gpt* delta mouse strain was produced at the MIT breeding  
10 facility and then housed in groups of up to five in polycarbonate microisolator cages on hardwood  
11 bedding (PharmaServ, Framingham, MA) under specific pathogen free conditions (free of  
12 *Helicobacter* spp., *Citrobacter rodentium*, *Salmonella* spp., endoparasites, ectoparasites and  
13 exogenous murine viral pathogens). All mice were maintained in an Association for the  
14 Assessment and Accreditation of Laboratory Animal Care International (AAALAC) accredited  
15 facility at 70±2°F, 30-70% relative humidity, a 12:12 hour light to dark cycle, fed standard rodent  
16 chow (Purina Mills, St. Louis MO) and given water *ad libitum*. Animal use was approved by the  
17 MIT Committee on Animal Care. The mice were dosed with *H. hepaticus* 3B1 organisms which  
18 were harvested from blood agar plates after incubation of 2-3 days under microaerobic conditions  
19 as described previously (3).

20 ***gpt* Assay**

21 Briefly, phages rescued from murine genomic DNA were transfected into *E. coli* YG6020  
22 expressing Cre recombinase. Two equal volumes of infected cells were spread on plates containing  
23 chloramphenicol (Cm) alone (calculating a total number of the *cat-gpt* plasmids rescued from

24 phages) or Cm and 6-TG (selecting the loss-of-function *gpt* plasmid), respectively. The plates  
25 were cultured for approximately 3 days until 6-TG-resistant colonies appeared. The 6-TG-  
26 resistant colonies were restreaked on plates containing Cm and 6-TG to further confirm their 6-  
27 TG-resistant phenotype. Confirmed 6-TG-resistant colonies were sent for direct colony  
28 sequencing at Quintarabio (Allston, MA) with the primers targeting the entire *gpt* sequence as  
29 described previously (4). Sequences were aligned with the *E. coli gpt* gene (GenBank M13422.1)  
30 using the DNASTAR lasergene 13 software package (DNASTAR, Inc., Madison, WI).

### 31 **qPCR analyses on intestinal cytokines**

32 Total RNA from murine cecal tissues was prepared using Trizol Reagents following the  
33 supplier's instructions (Invitrogen). cDNA from tissue mRNA (2µg) was reverse-transcribed using  
34 the High Capacity cDNA Archive kit following the supplier's instructions (Life Technologies,  
35 Foster City, CA). Using the 7500 Fast Real-Time PCR System, mRNA expression of murine genes  
36 involved in innate immunity and oncogenesis, including *Ifnγ*, *Tnfa*, *iNos*, *Il-17A*, *Il-22*, *Atm* and  
37 *Atr*, were measured using primers and probes from Life Technologies. All target genes were  
38 normalized to the endogenous control glyceraldehyde-3-phosphate dehydrogenase (*Gapdh*)  
39 mRNA, and expressed as fold change in reference to sham-dosed control mice using the  
40 Comparative C<sub>T</sub> method (Applied Biosystems User Bulletin no. 2).

### 41 **qPCR Assays for bacteria**

42 Colonization levels of cecal and colonic *H. hepaticus* 3B1 were measured using the *cdtB*-  
43 based primers and probe as described previously (5). Levels of *pks+* *E. coli* in the cecum, colon  
44 and feces were enumerated using a *clbB*-based primer pair (ClbB-F: 5'-GCG CAT CCT CAA  
45 GAG TAA ATA-3' and ClbB-R: 5'-GCG CTC TAT GCT CAT CAA CC-3') with the SyBr green

46 master mixture (Thermo Fisher Scientific, Waltham, MA). The primer pair was designed to  
47 amplify a ~280 bps region of *clbB* as described previously (6). A standard curve was generated  
48 using serial 10-fold dilutions of the *H. hepaticus* 3B1 genomic DNA or the *E. coli* NC101 genome  
49 (~5 Mb, GenBank: NZ\_AEFA00000000.1) representing  $1 \times 10^6$  to 10 genome copies.

## 50 **Immunohistochemistry**

51 Briefly, the slides were incubated with mAb either for  $\gamma$ H2AX (1:200 dilution) or  
52 for anti-iNos (1:500 dilution), followed by incubation with Alexa Fluor 488-conjugated anti-rabbit  
53 F(ab')<sub>2</sub> fragment (1:750, Cell Signaling). The cell nuclei were stained using 10  $\mu$ l of Prolong Gold  
54 Antifade Reagent with DAPI (Cell Signaling). The tissue sections were visualized using a Zeiss  
55 Axioskop 2 Plus microscope (Zeiss, Germany). Levels of epithelial iNos expression and  $\gamma$ H2AX  
56 foci-positive epithelial cells in the ceca and colons were graded for intensity, distribution and crypt-  
57 positivity of fluorescence signal with scores of ascending 0-4 respectively; an index of iNos  
58 expression and  $\gamma$ H2AX foci-positive epithelial cells represents a total of scores of these 3  
59 categories with a maximal number of 12.

## 60 **Statistical Analysis**

61 All statistical analyses were performed using the Prism 5 software Package (Graphpad, San  
62 Diego, CA). Intestinal scores of HAI, mutation frequencies in the lower bowel, iNos expression  
63 and  $\gamma$ H2AX foci-positive epithelial cells were compared between groups by the Mann-Whitney U-  
64 test. Data on colonization levels of *H. hepaticus* and *pks+* *E. coli*, and cytokine mRNA levels were  
65 examined for normality of the distribution using the Kolmogorov-Smirnov test. The data with and  
66 without the normality of distribution were analyzed using the two-tailed Student's *t* test and the  
67 Mann-Whitney U-test, respectively. Values of  $P < 0.05$  were considered significant.

## 68 Results

69 There was no significant difference in both cecal and colonic mutation frequencies between  
70 infected females and their controls, although the average level of colonic MFs was relatively higher  
71 in the infected females ( $9.15 \pm 3.78 \times 10^{-6}$ ) compared to that in the control females ( $5.86 \pm 3.26 \times 10^{-6}$ ) (Figure 2A, Table I). MF data showed that the average level of the colonic MFs were relatively  
72 higher than that of the cecal MFs in the control males, whereas opposite was true for the control  
73 females (Figure 2A, Table 1). In addition, the average levels of cecal and colonic MFs were  
74 relatively lower and higher in the control males compared to the control females, respectively  
75 (Figure 2A, Table 1). It is worth noting that all these differences in MFs were statistically  
76 insignificant. In addition, the average G>T MF was significantly higher in the cecum  
77 ( $3.66 \pm 2.97 \times 10^{-6}$ ) than that in the colon ( $0.39 \pm 2.97 \times 10^{-6}$ ) in the control females (Figure 2B,  
78  $P=0.048$ ) and also was relatively higher compared to the cecum of the control males without  
79 statistical significance (Figure 2B).

81

## 82 Reference

- 83 1. Nohmi T, Katoh M, Suzuki H, Matsui M, Yamada M, Watanabe M, Suzuki M, Horiya N, Ueda O,  
84 Shibuya T, Ikeda H, Sofuni T. A new transgenic mouse mutagenesis test system using Spi- and 6-  
85 thioguanine selections. *Environ Mol Mutagen* 1996;28:465-70.
- 86 2. Fox JG, Ge Z, Whary MT, Erdman SE, Horwitz BH. *Helicobacter hepaticus* infection in mice:  
87 models for understanding lower bowel inflammation and cancer. *Mucosal Immunol* 2011;4:22-  
88 30.
- 89 3. Fox JG, Dewhirst FE, Tully JG, Paster BJ, Yan L, Taylor NS, Collins MJ, Jr., Gorelick PL, Ward JM.  
90 *Helicobacter hepaticus* sp. nov., a microaerophilic bacterium isolated from livers and intestinal  
91 mucosal scrapings from mice. *J Clin Microbiol* 1994;32:1238-45.
- 92 4. Sheh A, Lee CW, Masumura K, Rickman BH, Nohmi T, Wogan GN, Fox JG, Schauer DB. Mutagenic  
93 potency of *Helicobacter pylori* in the gastric mucosa of mice is determined by sex and duration  
94 of infection. *Proc Natl Acad Sci U S A* 2010;107:15217-22.
- 95 5. Ge Z, White DA, Whary MT, Fox JG. Fluorogenic PCR-based quantitative detection of a murine  
96 pathogen, *Helicobacter hepaticus*. *J Clin Microbiol* 2001;39:2598-602.

97 6. Arthur JC, Perez-Chanona E, Muhlbauer M, Tomkovich S, Uronis JM, Fan TJ, Campbell BJ,  
98 Abujamel T, Dogan B, Rogers AB, Rhodes JM, Stintzi A, *et al.* Intestinal inflammation targets  
99 cancer-inducing activity of the microbiota. *Science* 2012;338:120-3.

100

101
